# Supplementary material for: Profiling of terminating ribosomes reveals translational control at stop codons
Source: eLife. 2026 Jul 7;14:RP109257. doi: 10.7554/eLife.109257 (PMC13341110; doi:10.7554/eLife.109257)
Supplement: Supplementary file 1. [file elife-109257-supp1.xlsx]

## Sheet: Sheet1
Table S1. List of primers and shRNA targeting sequences
Number	Name	Sequence	Description
1	GFP-F	﻿TAATACGACTCACTATAGGGacatttgcttctgacacaacGCCACCATGGTGAGCAAGGGCGAGGA	Forward primer for constructing GFP-HiBiT mRNA reporters
2	R-GFP-HiBiT-1	﻿CCTCTTCTGAGATGAGTTTTTGTTCGAACCGCGGGCCCTctaGCTAATCTTCTTGAACAGCCGCCAGCCGCTCACACTATTCATCATGGTGATGGTGATG	Reverse primer for constructing GFP-HiBiT mRNA reporter 1 with GAUGAAUAGU between GFP and HiBiT
3	R-GFP-HiBiT-2	﻿CCTCTTCTGAGATGAGTTTTTGTTCGAACCGCGGGCCCTctaGCTAATCTTCTTGAACAGCCGCCAGCCGCTCACACTGTTCATCATGGTGATGGTGATG	Reverse primer for constructing GFP-HiBiT mRNA reporter 2 with GAUGAACAGU between GFP and HiBiT
4	R-GFP-HiBiT-3	﻿CCTCTTCTGAGATGAGTTTTTGTTCGAACCGCGGGCCCTctaGCTAATCTTCTTGAACAGCCGCCAGCCGCTCACACTATTCGTCATGGTGATGGTGATG	Reverse primer for constructing GFP-HiBiT mRNA reporter 3 with GACGAAUAGU between GFP and HiBiT
5	R-GFP-HiBiT-4	﻿CCTCTTCTGAGATGAGTTTTTGTTCGAACCGCGGGCCCTctaGCTAATCTTCTTGAACAGCCGCCAGCCGCTCACACTGTTCGTCATGGTGATGGTGATG	Reverse primer for constructing GFP-HiBiT mRNA reporter 4 with GACGAACAGU between GFP and HiBiT
6	HiBiT-GFP-F	﻿GTGAGCGGCTGGCGGCTGTTCAAGAAGATTAGCccATGgctcgagGTGAGCAAGGGCGAGGAGCT	First round forward primer for constructing HiBiT-GFP product
7	GFP-R	﻿CCATAGAGCCCACCGCATCCCCAGCATGCC	Reverse primer for constructing HiBiT-GFP mRNA reporters
8	SIINFEKL-9N-HiBiT-F	TAATACGACTCACTATAGGGacatttgcttctgacacaacATGGAATCGATCATCAACTTCGAAAAGCTANNNNNNNNNGTGAGCGGCTGGCGG	Second round forward primer for constructing SIINFEKL-9 nt random-HiBiT-GFP mRNA library reporter
9	SIINFEKL-9N-UAGU-HiBiT-F	TAATACGACTCACTATAGGGacatttgcttctgacacaacATGGAATCGATCATCAACTTCGAAAAGCTANNNNNNNNNTAGTGTGAGCGGCTGGCGG	Second round forward primer for constructing SIINFEKL-9 nt random-UAGU-HiBiT-GFP mRNA library reporter
10	SIINFEKL-UAG-10N-HiBiT-F	﻿TAATACGACTCACTATAGGGacatttgcttctgacacaacATGGAATCGATCATCAACTTCGAAAAGCTATAGNNNNNNNNNNagcaacctcaaacaGTGAGCGGCTGGCGG	Second round forward primer for constructing SIINFEKL-UAG-10 nt random-HiBiT-GFP mRNA library reporter
11	SIINFEKL-GA rich-UAG uORF-F	TAATACGACTCACTATAGGGacatttgcttctgacacaacATGGAATCGATCATCAACTTCGAAAAGCTAGAGGAGGAATAGGTGAGCGGCTGGCGG	Second round forward primer for constructing SIINFEKL-GA rich-UAG-HiBiT-GFP mRNA reporter
12	SIINFEKL-C rich-UAG uORF-F	TAATACGACTCACTATAGGGacatttgcttctgacacaacATGGAATCGATCATCAACTTCGAAAAGCTAACCGCTCACTAGGTGAGCGGCTGGCGG	Second round forward primer for constructing SIINFEKL-C rich-UAG-HiBiT-GFP mRNA reporter
13	SIINFEKL-GA rich-uORF-F	TAATACGACTCACTATAGGGacatttgcttctgacacaacATGGAATCGATCATCAACTTCGAAAAGCTAGAGGAGGAAGTGAGCGGCTGGCGG	Second round forward primer for constructing SIINFEKL-GA rich-HiBiT-GFP mRNA reporter
14	SIINFEKL-C rich-uORF-F	TAATACGACTCACTATAGGGacatttgcttctgacacaacATGGAATCGATCATCAACTTCGAAAAGCTAACCGCTCACGTGAGCGGCTGGCGG	Second round forward primer for constructing SIINFEKL-C rich-HiBiT-GFP mRNA reporter
15	GFP-C rich-HiBiT-F 0-R	﻿ctagttgtggtttgtccaaactcatcaatgtatcttaCTAGCTAATCTTCTTGAACAGCCGCCAGCCGCTCACCTAGTGAGCGGTATGGTGATGGTGATG	Reverse primer for constructing GFP-C rich-HiBiT in frame 0 mRNA reporter
16	GFP-C rich-HiBiT-F 1-R	﻿ctagttgtggtttgtccaaactcatcaatgtatcttaCTAGCTAATCTTCTTGAACAGCCGCCAGCCGCTCACGCTAGTGAGCGGTATGGTGATGGTGAT	Reverse primer for constructing GFP-C rich-HiBiT in frame 1 mRNA reporter
17	GFP-C rich-HiBiT-F 2-R	﻿ctagttgtggtttgtccaaactcatcaatgtatcttaCTAGCTAATCTTCTTGAACAGCCGCCAGCCGCTCACGGCTAGTGAGCGGTATGGTGATGGTGA	Reverse primer for constructing GFP-C rich-HiBiT in frame 2 mRNA reporter
18	GFP-GA rich-HiBiT-F 0-R	﻿ctagttgtggtttgtccaaactcatcaatgtatcttaCTAGCTAATCTTCTTGAACAGCCGCCAGCCGCTCACCTATTCCTCCTCATGGTGATGGTGATG	Reverse primer for constructing GFP-GA rich-HiBiT in frame 0 mRNA reporter
19	GFP-GA rich-HiBiT-F 1-R	﻿ctagttgtggtttgtccaaactcatcaatgtatcttaCTAGCTAATCTTCTTGAACAGCCGCCAGCCGCTCACGCTATTCCTCCTCATGGTGATGGTGAT	Reverse primer for constructing GFP-GA rich-HiBiT in frame 1 mRNA reporter
20	GFP-GA rich-HiBiT-F 2-R	﻿ctagttgtggtttgtccaaactcatcaatgtatcttaCTAGCTAATCTTCTTGAACAGCCGCCAGCCGCTCACGGCTATTCCTCCTCATGGTGATGGTGA	Reverse primer for constructing GFP-GA rich-HiBiT in frame 2 mRNA reporter
21	GFP-C rich (-3)-HiBiT-F 0-R	﻿ctagttgtggtttgtccaaactcatcaatgtatcttaCTAGCTAATCTTCTTGAACAGCCGCCAGCCGCTCACCTAGGGCTCCTCATGGTGATGGTGATG	Reverse primer for constructing GFP-C rich (-3)-HiBiT in frame 0 mRNA reporter
22	GFP-C rich (-6)-HiBiT-F 0-R	﻿ctagttgtggtttgtccaaactcatcaatgtatcttaCTAGCTAATCTTCTTGAACAGCCGCCAGCCGCTCACCTATTCGGGCTCATGGTGATGGTGATG	Reverse primer for constructing GFP-C rich (-6)-HiBiT in frame 0 mRNA reporter
23	GFP-C rich (-9)-HiBiT-F 0-R	﻿ctagttgtggtttgtccaaactcatcaatgtatcttaCTAGCTAATCTTCTTGAACAGCCGCCAGCCGCTCACCTATTCCTCGGGATGGTGATGGTGATG	Reverse primer for constructing GFP-C rich (-9)-HiBiT in frame 0 mRNA reporter
24	h ABCE1-shRNA-F	ACCGG CCACTGATTGACATTTGATAA CTCGAG TTATCAAATGTCAATCAGTGG TTTTTTG	shRNA targeting sequences for ABCE1
25	h ABCE1-shRNA-R	CGAACAAAAAA CCACTGATTGACATTTGATAA CTCGAG TTATCAAATGTCAATCAGTGG C	shRNA targeting sequences for ABCE1
26	18s rRNA tt-gg_F	GGAAGGATCAggAACGGGAGACTG	Forward primer for 18S rRNA site mutuation
27	18s rRNA tt-gg_R	GCAGGTTCACCTACGGAA	Reverse primer for 18S rRNA site mutuation
28	h Rps26-shRNA-F	ACCGG GCTGTATGTGAAGCTACATTA CTCGAG TAATGTAGCTTCACATACAGC TTTTTTG	shRNA targeting sequences for Rps26
29	h Rps26-shRNA-R	CGAACAAAAAA GCTGTATGTGAAGCTACATTA CTCGAG TAATGTAGCTTCACATACAGC C	shRNA targeting sequences for Rps26
30	h Rps26-OE-F	CTGGCTAGTTAAGCTTGCCACCatgacaaagaaaagaaggaacaatggtcgt	Forward primer for Rps26/pcDNA3.1 myc-His B
31	h Rps26-OE-R	CTGGACTAGTGGATCCcatgggctttggtgggggacgtggggcagc	Reverse primer for Rps26/pcDNA3.1 myc-His B
32	5’ end adaptor-rG	AATGATACGGCGACCACCGAGATCTACACTCTTTCCCTACACGACGCTCTTCCGATCT rGrGrG	Ezra-seq adapter sequence 1
33	5’ end adaptor-rC	AATGATACGGCGACCACCGAGATCTACACTCTTTCCCTACACGACGCTCTTCCGATCT rCrCrC	Ezra-seq adapter sequence 2
34	RT primer	GCATCTCGGTGGTCCAATCAACTCCAGTCGTGTGACTGGAGTTGACGTGTGCTCTTCCGATCTTTTTTTTTTTTTVN	Ezra-seq RT primer
35	PCR primer-F	AATGATACGGCGACCACCGAGATCTACACTCTTTCCCTACACGACGCTCT	Ezra-seq forward primer
36	PCR primer-R-BC13	CAAGCAGAAGACGGCATACGAGAT TGTTGACT GTGACTGGAGTTCAGACGTGTGCTCT	Ezra-seq barcoded reverse primer 1
37	PCR primer-R-BC14	CAAGCAGAAGACGGCATACGAGAT ACGGAACT GTGACTGGAGTTCAGACGTGTGCTCT	Ezra-seq barcoded reverse primer 2
38	PCR primer-R-BC15	CAAGCAGAAGACGGCATACGAGAT TCTGACAT GTGACTGGAGTTCAGACGTGTGCTCT	Ezra-seq barcoded reverse primer 3
39	PCR primer-R-BC16	CAAGCAGAAGACGGCATACGAGAT CGGGACGG GTGACTGGAGTTCAGACGTGTGCTCT	Ezra-seq barcoded reverse primer 4
40	PCR primer-R-BC18	CAAGCAGAAGACGGCATACGAGAT GTGCGGAC GTGACTGGAGTTCAGACGTGTGCTCT	Ezra-seq barcoded reverse primer 5
41	PCR primer-R-BC19	CAAGCAGAAGACGGCATACGAGAT CGTTTCAC GTGACTGGAGTTCAGACGTGTGCTCT	Ezra-seq barcoded reverse primer 6
42	PCR primer-R-BC20	CAAGCAGAAGACGGCATACGAGAT AAGGCCAC GTGACTGGAGTTCAGACGTGTGCTCT	Ezra-seq barcoded reverse primer 7
43	PCR primer-R-BC21	CAAGCAGAAGACGGCATACGAGAT TCCGAAAC GTGACTGGAGTTCAGACGTGTGCTCT	Ezra-seq barcoded reverse primer 8
44	PCR primer-F-ATCACG	AATGATACGGCGACCACCGAGATCTACACTCTTTCCCTACACGACGCTCTTCCGATCTATCACGTCGATCATCAACTTCGAAAAGCTA	MPRA-seq barcoded forward primer 1
45	PCR primer-F-CGATGT	AATGATACGGCGACCACCGAGATCTACACTCTTTCCCTACACGACGCTCTTCCGATCTCGATGTTCGATCATCAACTTCGAAAAGCTA	MPRA-seq barcoded forward primer 2
46	PCR primer-F-CGATGT	AATGATACGGCGACCACCGAGATCTACACTCTTTCCCTACACGACGCTCTTCCGATCTTTAGGCTCGATCATCAACTTCGAAAAGCTA	MPRA-seq barcoded forward primer 3
47	PCR primer-F-TGACCA	AATGATACGGCGACCACCGAGATCTACACTCTTTCCCTACACGACGCTCTTCCGATCTTGACCATCGATCATCAACTTCGAAAAGCTA	MPRA-seq barcoded forward primer 4
48	PCR primer-F-ACAGTG	AATGATACGGCGACCACCGAGATCTACACTCTTTCCCTACACGACGCTCTTCCGATCTACAGTGTCGATCATCAACTTCGAAAAGCTA	MPRA-seq barcoded forward primer 5
49	PCR primer-F--GCCAAT	AATGATACGGCGACCACCGAGATCTACACTCTTTCCCTACACGACGCTCTTCCGATCTGCCAATTCGATCATCAACTTCGAAAAGCTA	MPRA-seq barcoded forward primer 6
50	RT/PCR primer-R	CAAGCAGAAGACGGCATACGAGATGTGACTGGAGTTCAGACGTGTGCTCTTCCGATCGCTAATCTTCTTGAACAGCCGCCAGCCGCTCAC	MPRA-seq RT and reverse primer
