# Supplementary figures and images for: Profiling of terminating ribosomes reveals translational control at stop codons
Source: eLife journal article supplement (doi:10.7554/elife.109257), 2025-11-14

Figure 2-Figure Supplement 1

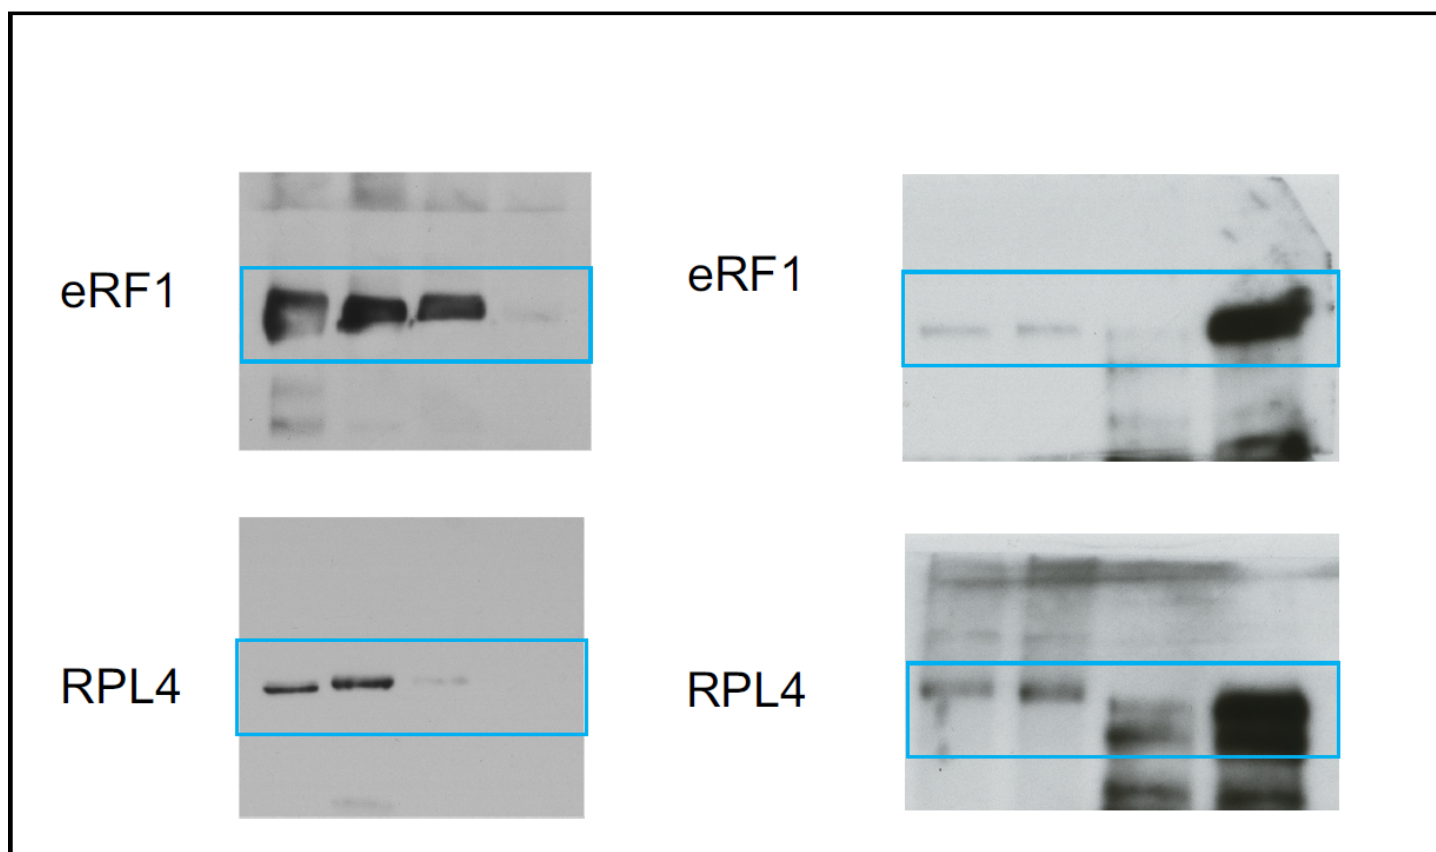

Supplement: fig2-figsupp1-data1 [file Figure 2-Figure Supplement 1-Source Data 1.pdf › Figure 2-Figure Supplement 1-Source Data 1.pdf]

Fig. 4E

HiBiT

$\beta$ -actin

GFP

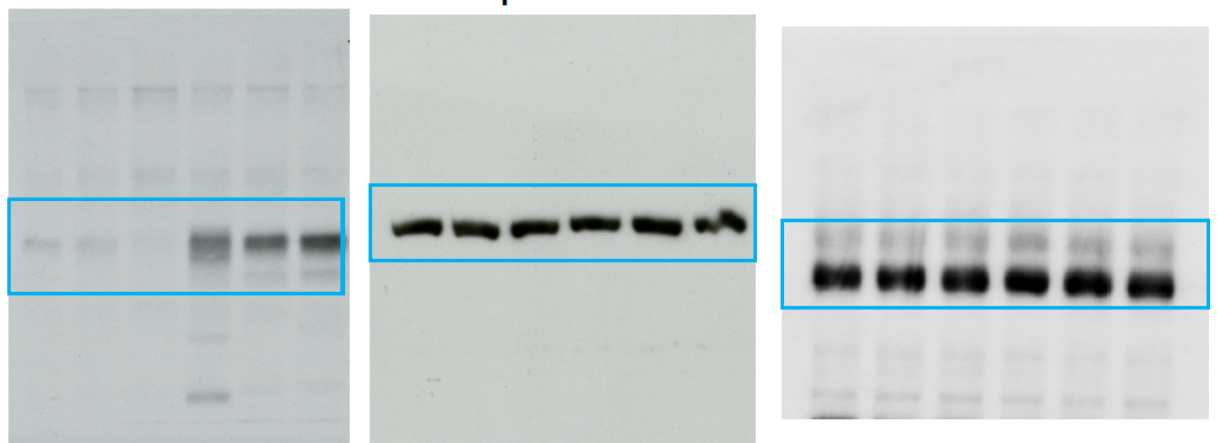

Supplement: fig4-data1 [file Figure 4-Source Data 1.pdf › Figure 4-Source Data 1.pdf]

Figure 4-Figure Supplement 3

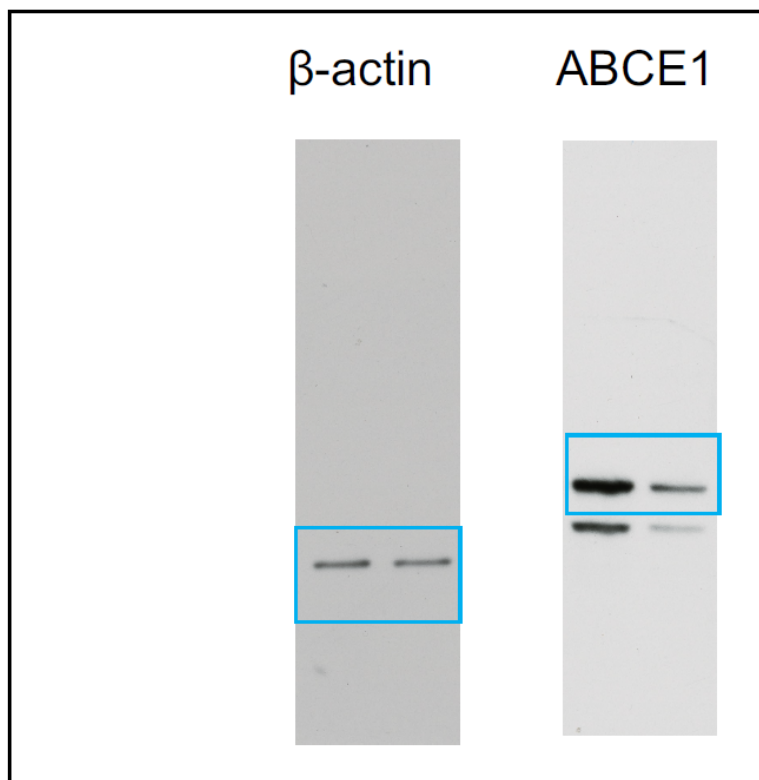

Supplement: fig4-figsupp3-data1 [file Figure 4-Figure Supplement 3-Source Data 1.pdf › Figure 4-Figure Supplement 3-Source Data 1.pdf]

Fig. 6B

eRF1

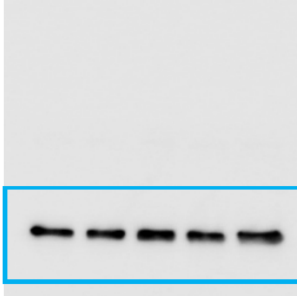

Rps26

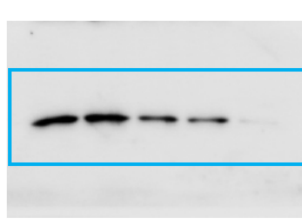

Rpl4

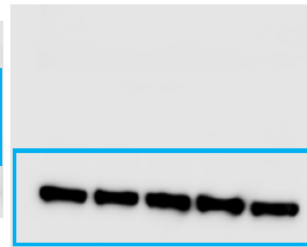

$\beta$ -actin

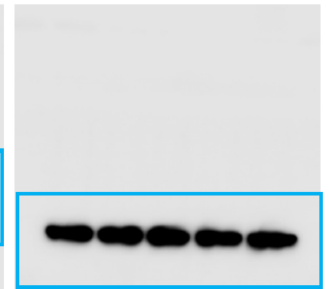

Supplement: fig6-data1 [file Figure 6-Source Data 1.pdf › Figure 6 Source Data/Figure 6-Source Data 1.pdf]

# Liver

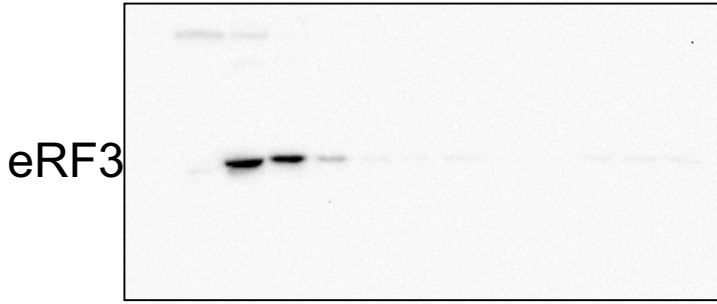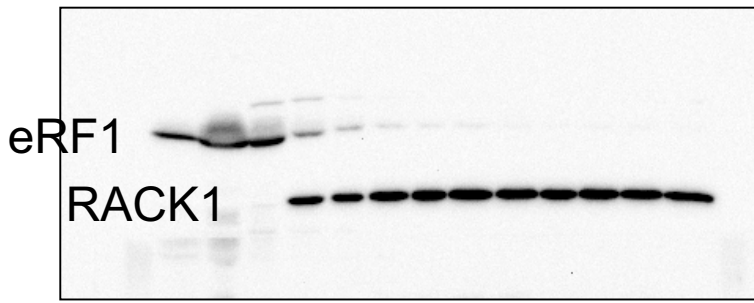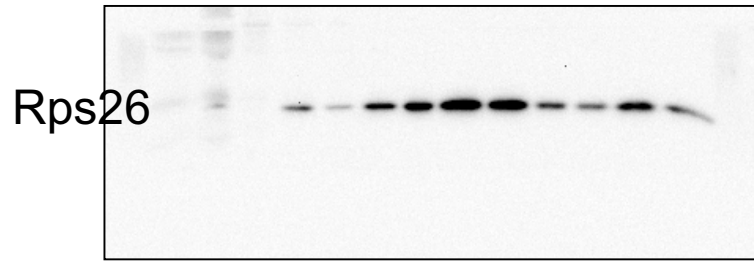

# Testis

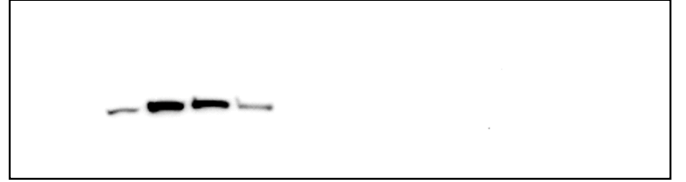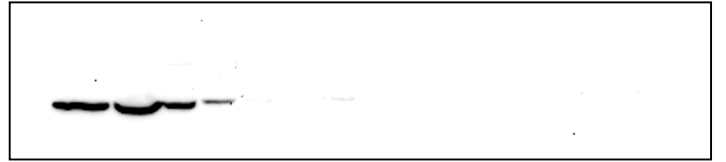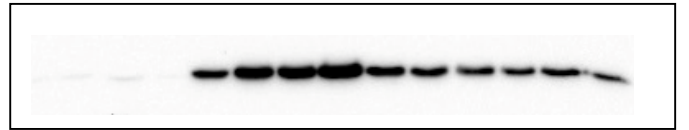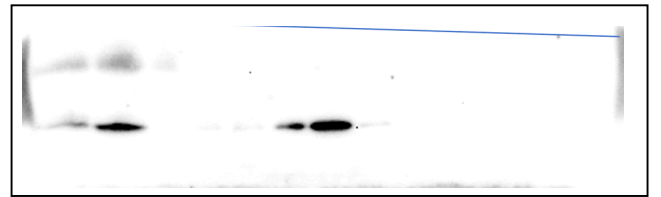

Supplement: fig6-data1 [file Figure 6-Source Data 2.pdf › Figure 6 Source Data/Figure 6-Source Data 2.pdf]

Figure 7-Figure Supplement 1

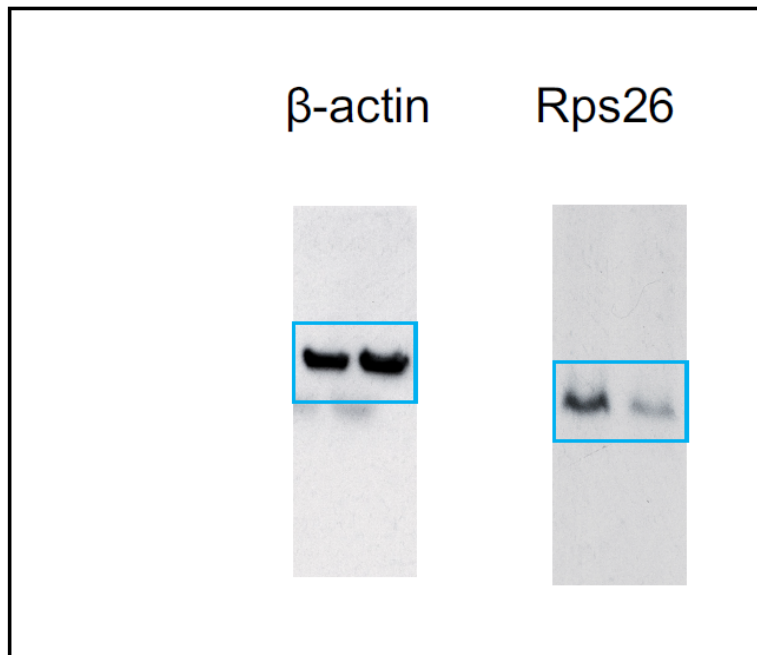

Supplement: fig7-figsupp1-data1 [file Figure 7-Figure Supplement 1-Source Data 1.pdf › Figure 7-Figure Supplement 1-Source Data 1.pdf]

Figure 7-Figure Supplement 2

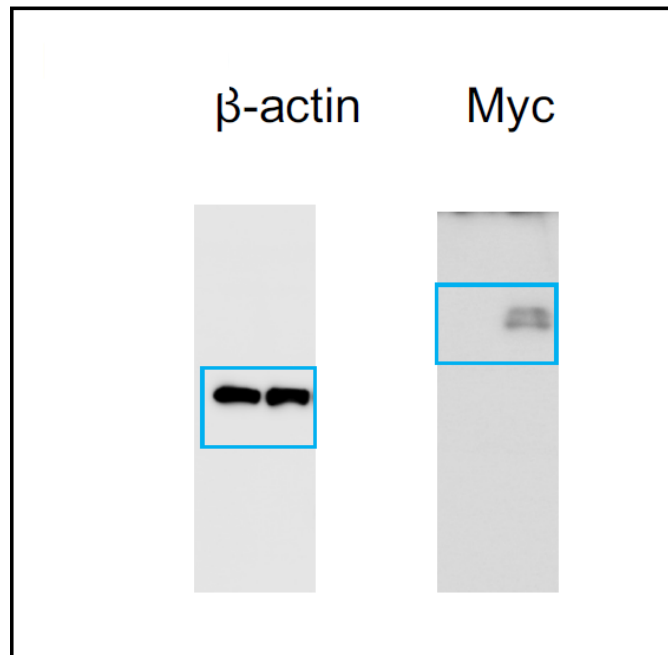

Supplement: fig7-figsupp1-data3 [file Figure 7-Figure Supplement 2-Source Data 1.pdf › Figure 7-Figure Supplement 2-Source Data 1.pdf]
